# Supplementary material for: Validation and Suitability Assessment of Multiplex Mesoscale Discovery Immunogenicity Assay for Establishing Serological Signatures Using Vaccinated, Non-Vaccinated and Breakthrough SARS-CoV-2 Infected Cases
Source: MDPI journal article supplement (doi:10.3390/vaccines12040433), 2024-04-18
Supplement: s1 [file s1]

**Supplementary Table S1**  
**Antigen details used for specificity study**

| Antigen details                     | Batch. no.                 | Source      | Storage(°C)   |         |
|-------------------------------------|----------------------------|-------------|---------------|---------|
| Wuhan variant virus (Working stock) | 14141D001                  | In-House    | -196 or below |         |
| CRM197 protein                      | IHWS/0.4mg/ml<br>CRM/20/01 | In-House    | -20           |         |
| Blank human serum details           |                            |             |               |         |
| Details                             | Batch. no.                 | Product No. | Source        | Storage |
| Blank human serum                   | 0000083106                 | S5393       | Sigma         | 2-8° C. |

**Supplementary Table S2: Values of Reference Standard 1 in MSD Arbitrary units (AU/ml).**

| Antigens                | CAL-01 | CAL-02 | CAL-03 | CAL-04 | CAL-05 | CAL-06  | CAL-07  | CAL-08 |
|-------------------------|--------|--------|--------|--------|--------|---------|---------|--------|
| <b>W-S</b>              | 72     | 18     | 4.5    | 1.13   | 0.281  | 0.0703  | 0.0176  | 0      |
| <b>SA-RBD (B.1.351)</b> | 4.4    | 1.1    | 0.275  | 0.0688 | 0.0172 | 0.0043  | 0.00107 | 0      |
| <b>W-N</b>              | 70     | 17.5   | 4.38   | 1.09   | 0.273  | 0.0684  | 0.0171  | 0      |
| <b>Br-RBD (P.1)</b>     | 7.0    | 1.75   | 0.438  | 0.109  | 0.0273 | 0.00684 | 0.00171 | 0      |
| <b>UK-RBD (B.1.1.7)</b> | 18     | 4.5    | 1.13   | 0.281  | 0.0703 | 0.0176  | 0.00439 | 0      |
| <b>Br-S (P.1)</b>       | 29     | 7.25   | 1.81   | 0.453  | 0.113  | 0.0283  | 0.00708 | 0      |
| <b>UK-S (B.1.1.7)</b>   | 44     | 11     | 2.75   | 0.688  | 0.172  | 0.043   | 0.0107  | 0      |
| <b>SA-S (B.1.351)</b>   | 25     | 6.25   | 1.56   | 0.391  | 0.0977 | 0.0244  | 0.0061  | 0      |
| <b>W-RBD</b>            | 29     | 7.25   | 1.81   | 0.453  | 0.113  | 0.0283  | 0.00708 | 0      |

W-N, Wuhan Nucleocapsid; W-RBD, Wuhan receptor binding domain (RBD); W-S, Wuhan Spike (S); Br-RBD [P.1], Brazil RBD; Br-S [P.1], Brazil S; UK-RBD [B.1.1.7], United Kingdom RBD; UK-S [B.1.1.7], United Kingdom S; SA-RBD [B.1.351], South Africa RBD; SA-S [B.1.351] South Africa S.

**Supplementary Table S3: Assigned values (AU/ml) for sera panel**

| <b>Sample ID</b> | <b>W-N</b> | <b>W-S</b> | <b>W-RBD</b> | <b>UK-S<br/>[B.1.1.7]</b> | <b>UK-RBD<br/>[B.1.1.7]</b> | <b>SA-S<br/>[B.1.351]</b> | <b>SA-RBD<br/>[B.1.351]</b> | <b>Br-S<br/>[P.1]</b> | <b>Br-RBD<br/>[P.1]</b> |
|------------------|------------|------------|--------------|---------------------------|-----------------------------|---------------------------|-----------------------------|-----------------------|-------------------------|
| <b>Sample 1</b>  | 7962       | 47192      | 15314        | 42996                     | 15076                       | 25790                     | 3978                        | 26232                 | 6513                    |
| <b>Sample 2</b>  | 206        | 2740       | 878          | 1794                      | 953                         | 1474                      | 637                         | 1562                  | 737                     |
| <b>Sample 3</b>  | 11168      | 35902      | 10717        | 34240                     | 8799                        | 10131                     | 4247                        | 19532                 | 7065                    |
| <b>Sample 4</b>  | 974        | 2960       | 1207         | 2267                      | 1257                        | 2125                      | 801                         | 1970                  | 1144                    |
| <b>Sample 5</b>  | 93756      | 493127     | 236403       | 482255                    | 263854                      | 351300                    | 174488                      | 357748                | 250290                  |
| <b>Sample 6</b>  | 40675      | 52522      | 21619        | 48303                     | 21832                       | 50230                     | 14690                       | 34269                 | 17854                   |
| <b>Sample 7</b>  | 4896       | 3297       | 790          | 2334                      | 694                         | 1882                      | 233                         | 2961                  | 352                     |
| <b>Sample 8</b>  | 45344      | 27350      | 7971         | 17918                     | 5658                        | 9616                      | 2155                        | 11526                 | 3381                    |
| <b>Sample 9</b>  | 130339     | 94318      | 21859        | 79280                     | 20147                       | 61017                     | 5195                        | 58047                 | 9520                    |

W-N, Wuhan Nucleocapsid; W-RBD, Wuhan receptor binding domain (RBD); W-S, Wuhan Spike (S); Br-RBD [P.1], Brazil RBD; Br-S [P.1], Brazil S; UK-RBD [B.1.1.7], United Kingdom RBD; UK-S [B.1.1.7], United Kingdom S; SA-RBD [B.1.351], South Africa RBD; SA-S [B.1.351] South Africa S.
